# Supplementary material for: Topological data analysis distinguishes parameter regimes in the Anderson-Chaplain model of angiogenesis
Source: PubMed Central journal article supplement (PMC8270459; doi:10.1371/journal.pcbi.1009094), 2021-06-28
Supplement: pcbi.1009094.s011.pdf [file pcbi.1009094.s011.pdf]

# Topological data analysis distinguishes parameter regimes in the Anderson-Chaplain model of angiogenesis

John T. Nardini<sup>1</sup>, Bernadette J. Stolz<sup>2</sup>, Kevin B. Flores<sup>1</sup>, Heather A. Harrington<sup>2</sup>, Helen M. Byrne<sup>\*2</sup>

**1** Department of Mathematics, North Carolina State University, Raleigh, North Carolina, USA

**2** Mathematical Institute, University of Oxford, Oxford, OX2 6GG, UK

\* [helen.byrne@maths.ox.ac.uk](mailto:helen.byrne@maths.ox.ac.uk)

| Parameter                          | Dimensional value                 |
|------------------------------------|-----------------------------------|
| $L$ length of domain               | 2 mm                              |
| $D_n$ endothelial cell diffusion   | $10^{-10}\text{cm}^2/s$           |
| $\chi_0$ chemotactic response      | $2600\text{cm}^2/(M \times s)$    |
| $\rho_0$ haptotactic response      | $2600\text{cm}^2/(M \times s)$    |
| $f_0$ fibronectin concentration    | $10^{-10}$ M                      |
| $D_c$ TAF diffusion                | $2.9 \times 10^{-7}\text{cm}^2/s$ |
| $\omega$ Production of fibronectin | $1.35 \times 10^{-16}\text{M/s}$  |
| $\mu$ uptake of fibronectin        | $1 \times 10^{-5}\text{M/s}$      |
| $\lambda$ Uptake of TAF            | $2.7 \times 10^{-6}\text{M/s}$    |

**S1 Table. Anderson-Chaplain model parameters.** List of mechanistic parameters for the Chaplain Anderson ABM from [1].

## References

1. Anderson ARA, Chaplain MAJ. Continuous and Discrete Mathematical Models of Tumor-induced Angiogenesis. *Bulletin of Mathematical Biology*. 1998;60(5):857–899. doi:10.1006/bulm.1998.0042.
