# Supplementary material for: Topological data analysis distinguishes parameter regimes in the Anderson-Chaplain model of angiogenesis
Source: PubMed Central journal article supplement (PMC8270459; doi:10.1371/journal.pcbi.1009094), 2021-06-28
Supplement: pcbi.1009094.s012.pdf [file pcbi.1009094.s012.pdf]

# Topological data analysis distinguishes parameter regimes in the Anderson-Chaplain model of angiogenesis

John T. Nardini<sup>1</sup>, Bernadette J. Stolz<sup>2</sup>, Kevin B. Flores<sup>1</sup>, Heather A. Harrington<sup>2</sup>, Helen M. Byrne<sup>\*2</sup>

**1** Department of Mathematics, North Carolina State University, Raleigh, North Carolina, USA

**2** Mathematical Institute, University of Oxford, Oxford, OX2 6GG, UK

\* [helen.byrne@maths.ox.ac.uk](mailto:helen.byrne@maths.ox.ac.uk)

| Parameter    | baseline value |
|--------------|----------------|
| $D$          | 0.00035        |
| $\chi$       | 0.38           |
| $\rho$       | 0.34           |
| $\beta$      | 0.05           |
| $\gamma$     | 0.1            |
| $\epsilon_1$ | 0.45           |
| $\epsilon_2$ | 0.45           |
| $k$          | 0.75           |

**S2 Table. Anderson-Chaplain model nondimensionalized parameters.**  
Baseline nondimensionalized mechanistic parameters for the Chaplain-Anderson Model from [1].

## References

1. Anderson ARA, Chaplain MAJ. Continuous and Discrete Mathematical Models of Tumor-induced Angiogenesis. *Bulletin of Mathematical Biology*. 1998;60(5):857–899. doi:10.1006/bulm.1998.0042.
