# Supplementary material for: Topological data analysis distinguishes parameter regimes in the Anderson-Chaplain model of angiogenesis
Source: PubMed Central journal article supplement (PMC8270459; doi:10.1371/journal.pcbi.1009094), 2021-06-28
Supplement: pcbi.1009094.s013.pdf [file pcbi.1009094.s013.pdf]

# Topological data analysis distinguishes parameter regimes in the Anderson-Chaplain model of angiogenesis

John T. Nardini<sup>1</sup>, Bernadette J. Stolz<sup>2</sup>, Kevin B. Flores<sup>1</sup>, Heather A. Harrington<sup>2</sup>, Helen M. Byrne<sup>\*2</sup>

**1** Department of Mathematics, North Carolina State University, Raleigh, North Carolina, USA

**2** Mathematical Institute, University of Oxford, Oxford, OX2 6GG, UK

\* [helen.byrne@maths.ox.ac.uk](mailto:helen.byrne@maths.ox.ac.uk)

| Feature                   | In Sample Accuracy | Out of Sample Accuracy |
|---------------------------|--------------------|------------------------|
| $\text{PIR}_1(K^{flood})$ | 71.9%              | 65.8%                  |
| $\beta_1(K^{flood})$      | 72.6%              | 63.4%                  |
| $\text{PIO}_1(K^{flood})$ | 71.1%              | 60.6%                  |
| $\beta_0(K^{flood})$      | 66.2%              | 52.6%                  |
| $\text{PIO}_0(K^{flood})$ | 60.0%              | 46.0%                  |
| $\text{PIR}_0(K^{flood})$ | 62.1%              | 44.9%                  |

**S3 Table. Individual plane sweeping clustering.** Out of Sample Accuracy scores for individual feature vectors from the flooding filtration using  $k$ -means classification with  $k = 5$ .
