# Supplementary material for: Topological data analysis distinguishes parameter regimes in the Anderson-Chaplain model of angiogenesis
Source: PubMed Central journal article supplement (PMC8270459; doi:10.1371/journal.pcbi.1009094), 2021-06-28
Supplement: pcbi.1009094.s014.pdf [file pcbi.1009094.s014.pdf]

# Topological data analysis distinguishes parameter regimes in the Anderson-Chaplain model of angiogenesis

John T. Nardini<sup>1</sup>, Bernadette J. Stolz<sup>2</sup>, Kevin B. Flores<sup>1</sup>, Heather A. Harrington<sup>2</sup>, Helen M. Byrne<sup>\*2</sup>

**1** Department of Mathematics, North Carolina State University, Raleigh, North Carolina, USA

**2** Mathematical Institute, University of Oxford, Oxford, OX2 6GG, UK

\* [helen.byrne@maths.ox.ac.uk](mailto:helen.byrne@maths.ox.ac.uk)

| Feature                                                  | In Sample Accuracy | Out of Sample Accuracy |
|----------------------------------------------------------|--------------------|------------------------|
| $\text{PIO}_0(K^{flood}) \ \& \ \text{PIR}_1(K^{flood})$ | 73.2%              | 66.4%                  |
| $\text{PIR}_0(K^{flood}) \ \& \ \text{PIR}_1(K^{flood})$ | 71.9%              | 65.6%                  |
| $\text{BC}_0(K^{flood}) \ \& \ \text{BC}_1(K^{flood})$   | 74.6%              | 65.0%                  |
| $\text{PIO}_0(K^{flood}) \ \& \ \text{BC}_1(K^{flood})$  | 72.6%              | 63.9%                  |
| $\text{PIR}_1(K^{flood}) \ \& \ \text{BC}_1(K^{flood})$  | 72.6%              | 63.4%                  |
| $\text{PIR}_0(K^{flood}) \ \& \ \text{BC}_1(K^{flood})$  | 72.6%              | 63.4%                  |
| $\text{PIO}_1(K^{flood}) \ \& \ \text{BC}_1(K^{flood})$  | 72.7%              | 63.4%                  |
| $\text{PIO}_0(K^{flood}) \ \& \ \text{PIO}_1(K^{flood})$ | 70.7%              | 62.5%                  |
| $\text{PIO}_1(K^{flood}) \ \& \ \text{PIR}_0(K^{flood})$ | 71.2%              | 60.6%                  |
| $\text{PIO}_1(K^{flood}) \ \& \ \text{PIR}_1(K^{flood})$ | 70.6%              | 59.8%                  |
| $\text{PIO}_0(K^{flood}) \ \& \ \text{BC}_0(K^{flood})$  | 66.4%              | 53.4%                  |
| $\text{PIO}_1(K^{flood}) \ \& \ \text{BC}_0(K^{flood})$  | 66.6%              | 52.1%                  |
| $\text{PIO}_0(K^{flood}) \ \& \ \text{PIR}_0(K^{flood})$ | 62.1%              | 51.5%                  |
| $\text{PIR}_1(K^{flood}) \ \& \ \text{BC}_0(K^{flood})$  | 66.1%              | 51.0%                  |
| $\text{PIR}_0(K^{flood}) \ \& \ \text{BC}_0(K^{flood})$  | 66.1%              | 51.0%                  |

**S4 Table. Double flooding clustering.** Out of Sample Accuracy scores for doubles of feature vectors from the flooding filtration using  $k$ -means classification with  $k = 5$ .
