# Supplementary material for: Topological data analysis distinguishes parameter regimes in the Anderson-Chaplain model of angiogenesis
Source: PubMed Central journal article supplement (PMC8270459; doi:10.1371/journal.pcbi.1009094), 2021-06-28
Supplement: pcbi.1009094.s015.pdf [file pcbi.1009094.s015.pdf]

# Topological data analysis distinguishes parameter regimes in the Anderson-Chaplain model of angiogenesis

John T. Nardini<sup>1</sup>, Bernadette J. Stolz<sup>2</sup>, Kevin B. Flores<sup>1</sup>, Heather A. Harrington<sup>2</sup>, Helen M. Byrne<sup>\*2</sup>

**1** Department of Mathematics, North Carolina State University, Raleigh, North Carolina, USA

**2** Mathematical Institute, University of Oxford, Oxford, OX2 6GG, UK

\* [helen.byrne@maths.ox.ac.uk](mailto:helen.byrne@maths.ox.ac.uk)

| Feature                 | In Sample Accuracy | Out of Sample Accuracy |
|-------------------------|--------------------|------------------------|
| $\text{PIR}_1(K^{LTR})$ | 92.3%              | 91.5%                  |
| $\text{PIO}_0(K^{LTR})$ | 90.1%              | 83.5%                  |
| $\text{PIO}_1(K^{RTL})$ | 82.4%              | 74.9%                  |
| $\text{PIO}_1(K^{LTR})$ | 82.6%              | 74.7%                  |
| $\beta_1(K^{LTR})$      | 82.3%              | 74.1%                  |
| $\text{PIR}_1(K^{RTL})$ | 78.3%              | 73.3%                  |
| $\text{PIO}_0(K^{RTL})$ | 82.9%              | 73.0%                  |
| $\beta_1(K^{RTL})$      | 77.9%              | 72.7%                  |
| $\text{PIR}_0(K^{RTL})$ | 78.0%              | 72.7%                  |
| $\beta_0(K^{RTL})$      | 79.0%              | 70.8%                  |
| $\beta_1(K^{TTB})$      | 74.1%              | 68.6%                  |
| $\beta_0(K^{LTR})$      | 77.7%              | 66.1%                  |
| $\beta_1(K^{BTT})$      | 71.4%              | 65.0%                  |
| $\text{PIO}_1(K^{BTT})$ | 73.3%              | 64.5%                  |
| $\text{PIO}_1(K^{TTB})$ | 73.9%              | 64.5%                  |
| $\beta_0(K^{BTT})$      | 72.3%              | 61.4%                  |
| $\text{PIR}_1(K^{BTT})$ | 69.3%              | 60.6%                  |
| $\text{PIO}_0(K^{TTB})$ | 68.0%              | 60.1%                  |
| $\text{PIR}_1(K^{TTB})$ | 70.1%              | 59.8%                  |
| $\text{PIO}_0(K^{BTT})$ | 67.9%              | 56.5%                  |
| $\text{PIR}_0(K^{LTR})$ | 67.1%              | 54.8%                  |
| $\beta_0(K^{TTB})$      | 64.6%              | 50.1%                  |
| $\text{PIR}_0(K^{BTT})$ | 55.6%              | 41.6%                  |
| $\text{PIR}_0(K^{TTB})$ | 51.9%              | 36.6%                  |

**S5 Table. Individual plane sweeping clustering.** Out of Sample Accuracy scores for individual feature vectors from the sweeping plane filtration using  $k$ -means classification with  $k = 5$ .
